# Supplementary material for: ANISEED 2017: extending the integrated ascidian database to the exploration and evolutionary comparison of genome-scale datasets
Source: Oxford University Press journal article supplement (doi:10.1093/nar/gkx1108), 2017-11-09
Supplement: gkx1108_supp.zip [file gkx1108_supp.zip]

Archive with 3 entries (3 files):
- Figure S1-gkx1108.pdf
- List of supplementary data-Brozovic et al-gkx1108.pdf
- nar-02872-data-e-2017-File005_new.pdf
