# Supplementary figures and images for: ANISEED 2017: extending the integrated ascidian database to the exploration and evolutionary comparison of genome-scale datasets
Source: Oxford University Press journal article supplement (doi:10.1093/nar/gkx1108), 2017-11-09

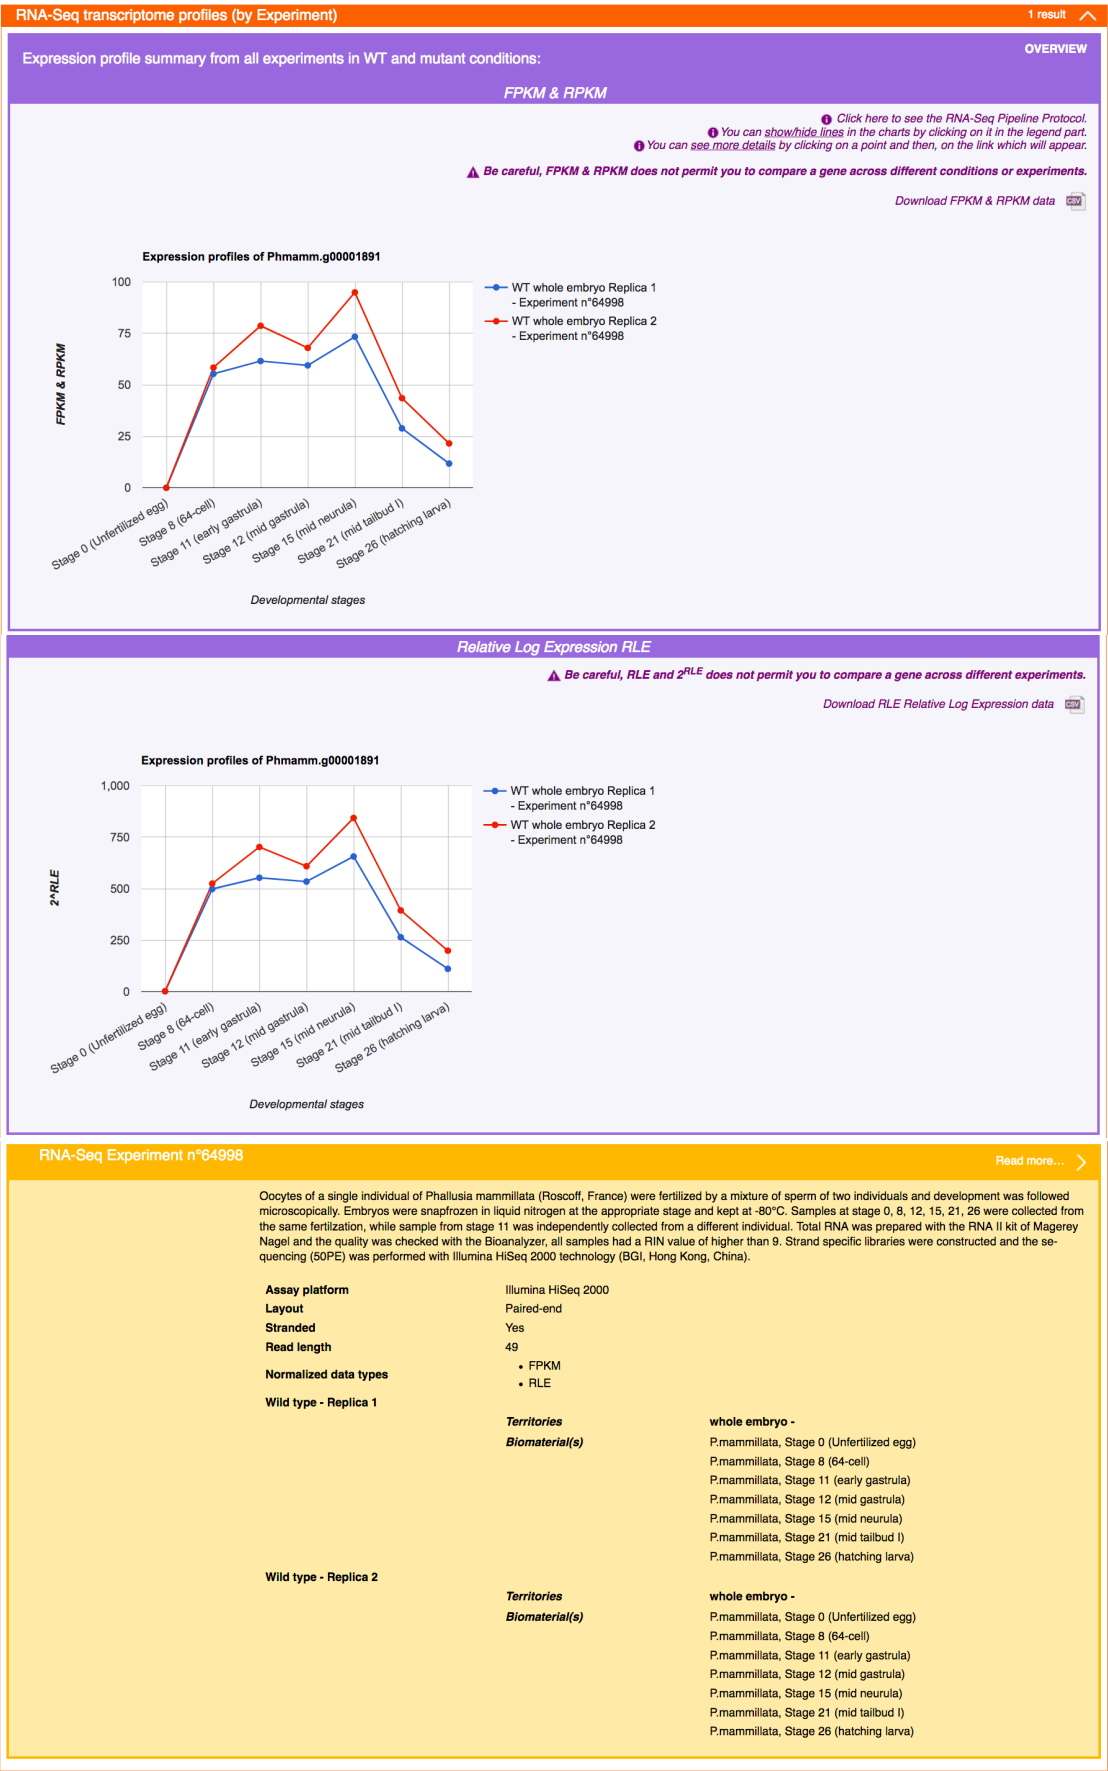

Supplement: gkx1108_supp.zip [file gkx1108_supp.zip]
